# Supplementary material
Source: PubMed Central journal article supplement (PMC7966152)
Supplement: 2878_materials.pdf [file 2878_materials.pdf]

**On-line Table 1: Univariate statistics between patients with complete recanalization and patients with persistent occlusion**

|                                                                       | Persistent Occlusion<br>(n = 30, 67.0%) | Recanalized<br>(n = 15, 33.3%) | P<br>Value         |
|-----------------------------------------------------------------------|-----------------------------------------|--------------------------------|--------------------|
| <b>Demographics</b>                                                   |                                         |                                |                    |
| Age (median) (IQR)                                                    | 72.5 (60.5–80)                          | 73 (59–77)                     | .682               |
| Female (No.) (%)                                                      | 14 (46.7)                               | 6 (40.0)                       | .671               |
| <b>Risk factors</b>                                                   |                                         |                                |                    |
| Hypertension (No.) (%)                                                | 20 (66.7)                               | 9 (60)                         | .660               |
| Diabetes (No.) (%)                                                    | 7 (23.3)                                | 2 (13.3)                       | .429               |
| Smoking (No.) (%)                                                     | 13 (43.3)                               | 7 (46.7)                       | .832               |
| Hyperlipidemia (No.) (%)                                              | 16 (53.3)                               | 5 (33.3)                       | .205               |
| Alcoholism (No.) (%)                                                  | 7 (23.3)                                | 6 (40.0)                       | .245               |
| Atrial fibrillation (No.) (%)                                         | 9 (30.0)                                | 4 (26.7)                       | .816               |
| History of stroke/TIA (No.) (%)                                       | 3 (10.0)                                | 3 (20.0)                       | .352               |
| Coronary artery disease (No.) (%)                                     | 8 (26.7)                                | 1 (6.7)                        | .114               |
| Hyperfibrinogenemia (No.) (%)                                         | 12 (40.0)                               | 7 (46.7)                       | .670               |
| Hyperglycemia (No.) (%)                                               | 19 (63.3)                               | 11 (73.3)                      | .502               |
| Hematocrit (median) (IQR)                                             | 42 (40–43.2)                            | 41 (38–42)                     | .124               |
| Platelet count (median) (IQR)                                         | 223 (184–258)                           | 264 (205–302)                  | .380               |
| Statin use (No.) (%)                                                  | 10 (33.3)                               | 3 (20.0)                       | .352               |
| Antiplatelet use (No.) (%)                                            | 15 (50)                                 | 7 (46.7)                       | .833               |
| <b>TOAST (No.)</b>                                                    |                                         |                                |                    |
| Large artery (No.) (%)                                                | 14 (46.7)                               | 1 (6.7)                        | .007 <sup>a</sup>  |
| Cardioembolic (No.) (%)                                               | 11 (36.7)                               | 10 (66.7%)                     | .057               |
| Indeterminate (No.) (%)                                               | 5 (16.7)                                | 4 (26.7)                       | .429               |
| <b>Clinical variables</b>                                             |                                         |                                |                    |
| NIHSS at baseline (median) (IQR)                                      | 17.5 (12.0–20.2)                        | 14 (10–18)                     | .284               |
| Day 1 NIHSS (median) (IQR)                                            | 15.0 (9.5–18.5)                         | 8.5 (5.8–18)                   | .166               |
| Infarct side, left (No.) (%)                                          | 18 (60)                                 | 10 (66.7)                      | .664               |
| ASPECTS at baseline (median) (IQR)                                    | 8.0 (6.0–9.2)                           | 9.0 (7.0–10.0)                 | .250               |
| HMCAS (No.) (%)                                                       | 17 (65.39)                              | 9 (34.61)                      | .475               |
| Dot sign (No.) (%)                                                    | 8 (50)                                  | 8 (50)                         | .475               |
| Thrombus length (mm) (median) (IQR)                                   | 13.7 (8.4–21.6)                         | 11.7 (6.8–13.5)                | .159               |
| Thrombus area (mm <sup>2</sup> ) (median) (IQR)                       | 25.5 (17.2–39.5)                        | 25 (15–31)                     | .198               |
| Absolute thrombus HU (median) (IQR)                                   | 42.0 (38.7–45.1)                        | 50.0 (42.2–55.2)               | .001 <sup>a</sup>  |
| Contralateral MCA HU (median) (IQR)                                   | 36.6 (35.7–38.0)                        | 33.1 (28.1–36.8)               | .021 <sup>a</sup>  |
| rHU (median) (IQR)                                                    | 1.15 (1.18–1.23)                        | 1.52 (1.39–1.70)               | <.001 <sup>a</sup> |
| HU ratio >1.382                                                       | 0 (0%)                                  | 13 (86.7%)                     | <.001 <sup>a</sup> |
| <b>Occlusion location</b>                                             |                                         |                                |                    |
| M1-MCA (No.) (%)                                                      | 18 (60.0%)                              | 8 (53.3%)                      | .670               |
| M2-MCA (No.) (%)                                                      | 5 (16.7%)                               | 6 (40.0%)                      | .086               |
| M1-M2 MCA (No.) (%)                                                   | 7 (23.3%)                               | 1 (6.7%)                       | .168               |
| DWI infarct volume <12 hr (cm <sup>3</sup> ) (median) (IQR)           | 20.5 (9.4–64.0)                         | 12.7 (6.7–67.3)                | .689               |
| DWI infarct volume at 72 hr (cm <sup>3</sup> ) (median) (IQR)         | 137.5 (27.3–194)                        | 36.0 (9.0–94.1)                | .084               |
| Final infarct volume (30-day FLAIR) (cm <sup>3</sup> ) (median) (IQR) | 29.0 (9.3–90.1)                         | 10.9 (7.4–93.7)                | .911               |
| <b>Treatment process and outcomes</b>                                 |                                         |                                |                    |
| Time from onset to rPA (min) (median) (IQR)                           | 159.5 (130–226)                         | 195 (145–224)                  | .308               |
| Day 3 NIHSS (median) (IQR)                                            | 14.0 (8.8–20.2)                         | 5.5 (1.0–15.5)                 | .026 <sup>a</sup>  |
| Day 30 NIHSS (median) (IQR)                                           | 8.0 (2.0–15.0)                          | 1.0 (1.0–11.0)                 | .221               |
| Day 90 NIHSS (median) (IQR)                                           | 5.5 (1.0–15.0)                          | 1.0 (0.0–9.0)                  | .290               |
| mRS score >2 at 3 mo (No.) (%)                                        | 15 (68.2%)                              | 7 (53.8%)                      | .396               |
| Hemorrhagic transformation (No.) (%)                                  | 10 (33.3%)                              | 5 (33.3%)                      | 1.000              |
| Symptomatic hemorrhagic transformation (No.) (%)                      | 2 (6.7%)                                | 2 (13.3%)                      | .459               |
| Mortality (No.) (%)                                                   | 7 (23.3%)                               | 3 (20.0%)                      | .800               |

<sup>a</sup> P value < .05.**On-line Table 2: Summary of class performance**

|     | Sensitivity | Specificity | Positive Predictive Value | Negative Predictive Value | r <sub>c</sub> |
|-----|-------------|-------------|---------------------------|---------------------------|----------------|
| rHU | 100         | 86.67       | 93.75                     | 100                       | .901           |
| LAA | 100         | 23.33       | 39.47                     | 100                       | .303           |

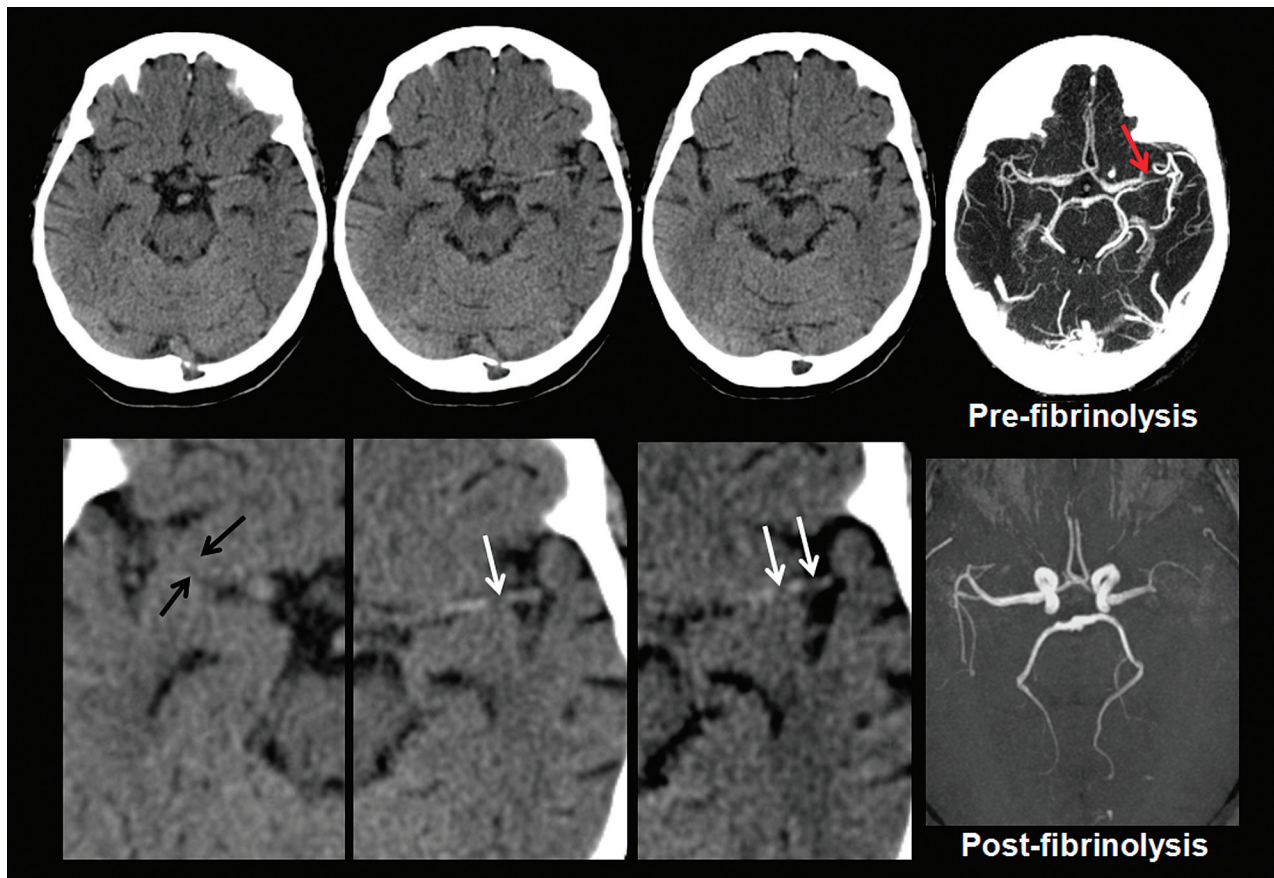

**On-line Fig.** A 79-year-old man presented with hemiparesis and aphasia 60 minutes after symptom onset. NCCT reveals a hyperattenuated left MCA (top images), Axial MIP of CTA (*red arrow*) reveals an occlusion in the postbifurcation segment of M1. The hyperattenuation seen in the left prebifurcation M1 segment proved permeable; HMCAS could be misdiagnosed only if NCCT was analyzed because this segment is actually more hyperattenuated than the contralateral one (bottom, *black arrows*). Most interesting, magnified images revealed a heterogeneous hypoattenuated thrombus (*white arrows*) with low rHU (not shown). Intravenous thrombolysis failed, as is seen on MRA (right bottom row).
